# Supplementary material for: Hierarchical 3D porous carbon with facilely accessible Fe–N4 single-atom sites for Zn–air batteries
Source: Royal Society of Chemistry journal article supplement (doi:10.1039/d1ta08050d), 2021-10-14
Supplement: d1ta08050d1.pdf [file d1ta08050d1.pdf]

**Supporting Information:**

**Hierarchical 3D Porous Carbon with Facilely Accessible Fe-N<sub>4</sub> Single-Atom Sites for Zn-Air Batteries**

Pingbo Li <sup>a,b</sup>, Xueqiang Qi <sup>a,c,\*</sup>, Lei Zhao <sup>b</sup>, Junjie Wang <sup>b</sup>, Meng Wang <sup>c,\*</sup>, Minhua Shao <sup>d</sup>, Jun Song Chen <sup>b</sup>, Rui Wu <sup>b,\*</sup> and Zidong Wei <sup>c</sup>

<sup>a</sup> College of Chemistry and Chemical Engineering, Chongqing University of Technology, Chongqing, 400054, P.R. China.

<sup>b</sup> School of Materials and Energy, University of Electronic Science and Technology of China, Chengdu, 611731, P.R. China.

<sup>c</sup> School of Chemistry and Chemical Engineering, Chongqing University, Chongqing, 400044, P.R. China.

<sup>d</sup> Department of Chemical and Biological Engineering, Hong Kong University of Science and Technology, Clear Water Bay, Kowloon, Hong Kong, P.R. China.

\* Corresponding author.

E-mail: ruiwu0904@uestc.edu.cn; xqqi@cqut.edu.cn; wmeng@cqu.edu.cn

## 1. Experimental Section

### 1.1. Chemicals and materials

All chemical reagents were employed without further treatment.  $\text{Zn}(\text{NO}_3)_2 \cdot 6\text{H}_2\text{O}$  (98%, Sinopharm Chem. reagent Co. Ltd, China),  $\text{FeCl}_3 \cdot 6\text{H}_2\text{O}$  (98%, Sinopharm Chem. reagent Co. Ltd, China), methanol (99.5%, Aldrich Industrial Co.), ammonia solution (28~30%, Sinopharm Chem. reagent Co. Ltd, China), 2-methylimidazole (98%, Aldrich Industrial Co.), Nafion (5 wt%). Tetraethyl orthosilicate (25%, Sigma Aldrich.).

### 1.2. Catalysts synthesis

#### 1.2.1. Synthesis of silica nanosphere

Silica nanospheres employed as templates were synthesized by a modified Stöber method.<sup>1</sup> Typically, tetraethyl orthosilicate (15 mL) was dropwise added to a mixture of ammonia solution (28~30%, 5 mL), ethanol (225 mL) and deionized water (30 mL). After 2 hours of continuous stirring, silica spheres were obtained by centrifugation, washing and vacuum drying overnight.

#### 1.2.2. Synthesis of SA-Fe-3DOMC

Silica nanospheres (0.5 g),  $\text{Zn}(\text{NO}_3)_2 \cdot 6\text{H}_2\text{O}$  (0.87 g) and  $\text{FeCl}_3 \cdot 6\text{H}_2\text{O}$  (25 mg) were firstly dispersed in 20 mL of methanol anhydrous. Subsequently, 1.0 g of 2-methylimidazole was dissolved in 20 mL of methanol anhydrous in another beaker. Next, the two above solutions were rapidly mixed together and heated at 60 °C for 24 h. The obtained  $\text{SiO}_2@\text{ZIF-8-Fe}$  nanocomposites were pyrolyzed at 900 °C for 2 h under Ar atmosphere with a ramp of 2 °C  $\text{min}^{-1}$ . Finally, the SA-Fe-3DOMC catalyst was obtained by HF leaching (8%, 40 mL) for 12 hours and a second heat-treatment in Ar for 1 hour at 900 °C. For comparison, the contrast samples were prepared under

conditions similar to that used for SA-Fe-3DOMC. NC was synthesized without ferric chloride, and Fe-N-C was synthesized with 50 mg ferric chloride by the same method.

### **1.3. Characterization of samples**

The morphologies of the prepared samples were observed by SEM (Phenom) and TEM (TEM, JEM2010F). HAADF-STEM image and EDS elemental mapping were also performed on FEI Tecnai. The structure of single Fe atoms was observed by Aberration-corrected HAADF-STEM (JEM-ARM300F). XRD were characterized on a Bruker D8 Advance A25X using Cu K $\alpha$  radiation. The Raman spectra were analyzed on Laser confocal instrument (Renishaw Invia). Nitrogen adsorption-desorption isotherms were performed on KuboX-1000, the pore size distribution in N<sub>2</sub> sorption isotherms were derived from the adsorption branch of the isotherm. Inductively coupled plasma mass spectrometry (ICP-MS) were conducted on Agilent 720ES, and X-ray photoelectron spectroscopy (XPS) results were obtained with a Thermo Fisher Scientific, Escalab 250Xi with Al K $\alpha$  radiation.

### **2. Electrochemical tests**

All the electrochemical measurements were performed using conventional three-electrode system. MSR electrode rotator (Versa STAT 3, Princeton Research, USA electrochemical workstation.) was used to carry out the rotating disk electrode (RDE). Potentiostat/Galvanostat (Versa STAT 3, Princeton Research, USA electrochemical workstation) was used to record. Carbon rod and Hg/HgO electrode (1 M KOH solution) were used as counter electrode and reference electrode, respectively. RDE with diameters of 5.0 mm were used as the working electrodes. First, 5 mg of the catalyst was dispersed in a mixed solution containing 190  $\mu$ L of deionized water, 760  $\mu$ L of isopropanol, and 50  $\mu$ L of a 5 wt% Nafion solution. To obtain a well-dispersed ink, the above mixed solution needed to

be sonicated for at least 2 h. The catalyst ink (20  $\mu\text{L}$ ) was then dropped evenly on the surface of the glassy carbon electrode in portions and dried at room temperature. The loading of the as-prepared catalyst is  $0.5 \text{ mg cm}^{-2}$ . For comparison, the loading of commercial 20 wt% Pt/C on the glassy carbon electrode is  $25 \mu\text{g}_{\text{Pt}} \text{ cm}^{-2}$ . Cyclic voltammetry (CV) curves were measured in 0.1 M KOH solutions saturated with  $\text{N}_2$  and  $\text{O}_2$ , respectively.<sup>2</sup> The measured potential was between 0.05 and 1.2 V, and the scan rate was  $10 \text{ mV s}^{-1}$ . The RED experiments were performed in  $\text{O}_2$  saturated 0.1 M KOH, and different speeds were measured with a scan rate of  $10 \text{ mV s}^{-1}$ . By performing CV 10,000 cycles in the 0.6-1.0 V range, the accelerated durability test (ADT) was performed at a sweep speed of  $100 \text{ mV s}^{-1}$ .

The K-L equations can be used to analyze kinetic parameters as following:<sup>3,4</sup>

$$\frac{1}{j} = \frac{1}{j_k} + \frac{1}{B\omega^{1/2}} \quad (1)$$

$$B = 0.2nF(D_0)^{2/3}v^{-1/6}C_0 \quad (2)$$

Where  $j$  represents the measured current density,  $\omega$  is the electrode rotating rate,  $F$  is the Faraday constant ( $96485 \text{ C mol}^{-1}$ ),  $j_k$  is the kinetic current density,  $C_0$  is the bulk concentration of  $\text{O}_2$  0.1 M KOH ( $1.2 \times 10^{-6} \text{ mol cm}^{-3}$ ),  $D_0$  is the oxygen diffusion coefficient ( $1.9 \times 10^{-5} \text{ cm}^2 \text{ s}^{-1}$ ) of 0.1 M KOH, and  $v$  is the kinematic viscosity of 0.1 M KOH ( $0.01 \text{ cm}^2 \text{ s}^{-1}$ ). As for the RRDE measurements, the potential on the disk electrode was scanned from 1.15 to 0.05V (vs. RHE) with a rate of  $10 \text{ mV s}^{-1}$ , while the ring-electrode potential was set at 1.3 V (vs. RHE). The  $\text{H}_2\text{O}_2$  production percentage and the electron transfer number ( $n$ ) were obtained from the following equations:

$$\text{H}_2\text{O}_2(\%) = 200 \frac{I_r/N}{I_d + I_r/N} \quad (3)$$

$$n = 4 \frac{I_d}{I_d + I_r/N} \quad (4)$$

where  $I_d$  and  $I_r$  are the disk current and the ring current, respectively, and  $N$  is the current collection efficiency. and  $N$  means the current collection efficiency (0.37) of the Pt ring.

### 3. Zn-air battery tests.

For battery tests, a polished Zinc plate was used as the anode, carbon paper loaded with the SA-Fe-3DOMC catalyst was the air cathode and a mixture of 6 M KOH and 0.2 M  $Zn(CH_3COO)_2$  was the electrolyte.<sup>5-7</sup> 6 mg of catalyst was dispersed into 1100  $\mu\text{L}$  ethanol and 100  $\mu\text{L}$  5% Nafion aqueous solution followed by ultrasonic treatment for 30 min to prepare the catalyst ink. 400  $\mu\text{L}$  of the prepared catalyst ink was loaded on 1  $\text{cm}^2$  carbon paper and natural drying (loading amount of 2.0  $\text{mg cm}^{-2}$ ). A control sample is also prepared by adding 3 mg Pt/C into 1170  $\mu\text{L}$  ethanol and 30  $\mu\text{L}$  5% Nafion aqueous solution (loading amount of 1.0  $\text{mg cm}^{-2}$ ). The discharge polarization curves were obtained on a potentiostat/galvanostat (Versa STAT 3, Princeton Research, USA electrochemical workstation). The discharge curves at different currents and galvanostatic discharge stability were obtained on Bio-logic SP-150 electrochemical workstation.

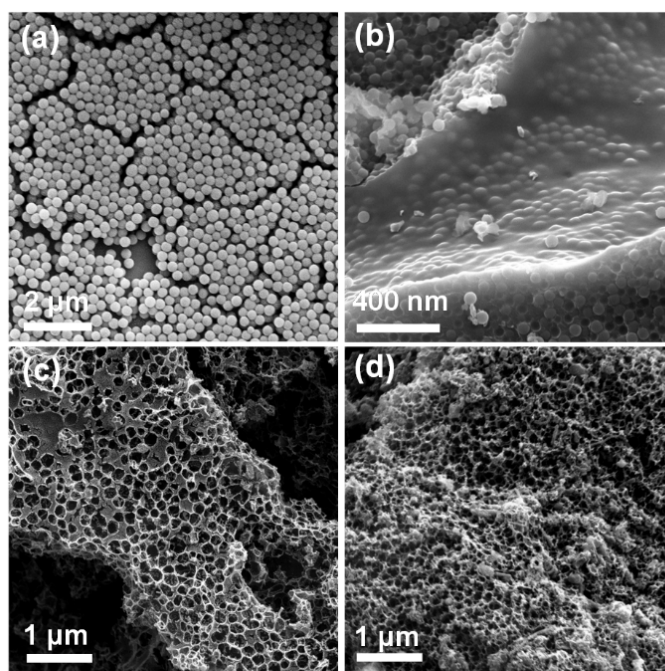

**Fig. S1** (a) SEM images of silicon spheres, (b) ZIF-8-Fe grown in situ on the surface of silicon spheres, (c) N-C and (d) Fe-N-C-50.

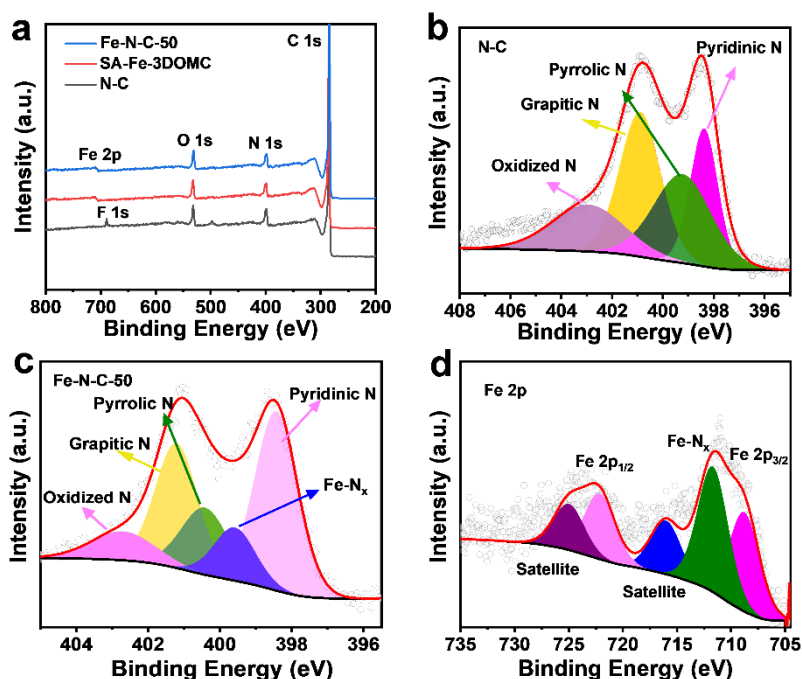

**Fig. S2** (a) XPS spectra Survey scan of N-C, SA-Fe-3DOMC and Fe-N-C-50, (b, c) N 1s high resolution XPS spectra of N-C and Fe-N-C-50. (d) Fe 2p high resolution XPS spectra of Fe-N-C-50.

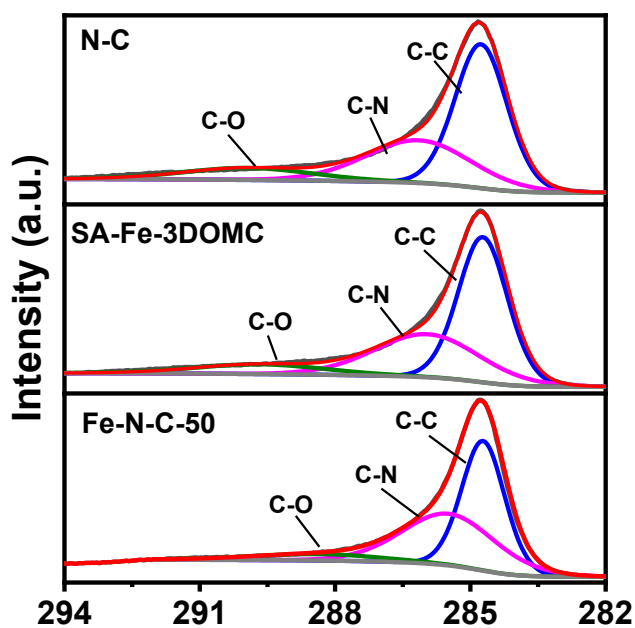

**Fig. S3** C 1s high resolution XPS spectra of N-C, SA-Fe-3DOMC and Fe-N-C-50.

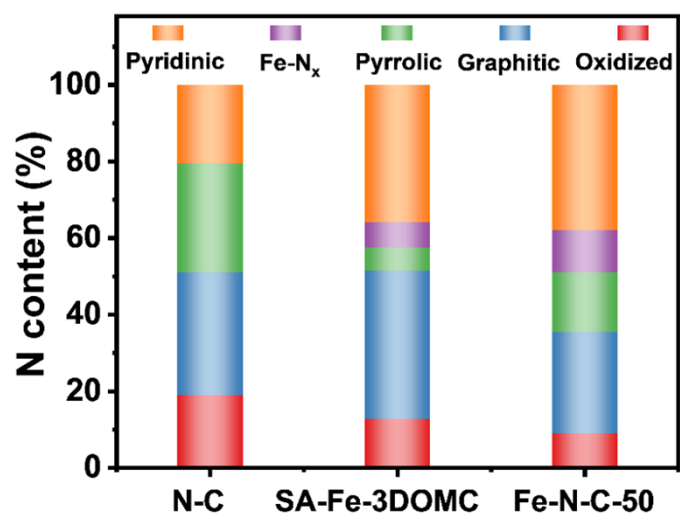

**Fig. S4** Relative content of different N species of N-C, SA-Fe-3DOMC and Fe-N-C-50.

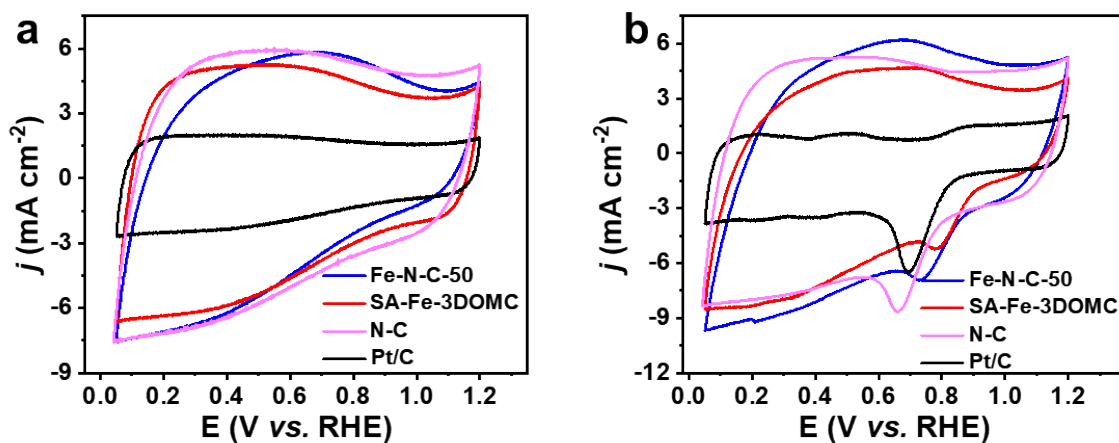

**Fig. S5** CV curves of Pt/C, N-C, SA-Fe-3DOMC and Fe-N-C-50 measured at the same scan speed ( $10 \text{ mV s}^{-1}$ ) of ORR in (a) N<sub>2</sub> and (b) O<sub>2</sub> saturated 0.1 M KOH solution.

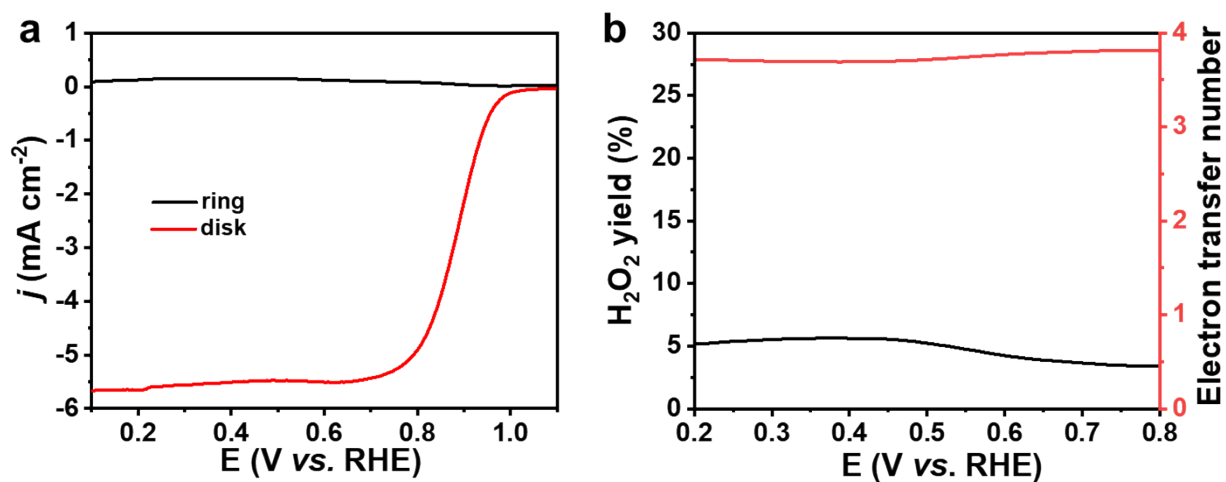

**Fig. S6** (a) RRDE voltammograms and (b) the calculated electron transfer numbers and H<sub>2</sub>O<sub>2</sub> yields of SA-Fe-3DOMC catalyst.



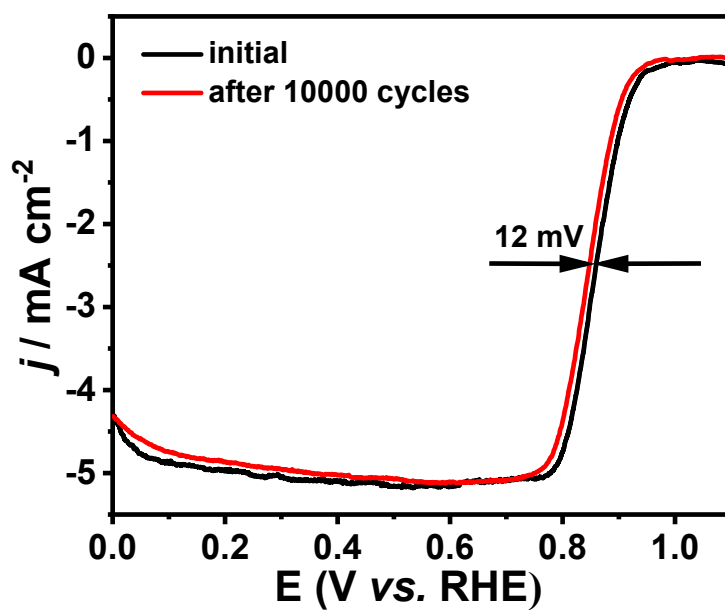

**Fig. S7** ORR LSV curves of 20 wt% Pt/C initially and after 10,000 cycles between 0.6 and 1.0 V at a scan rate of  $100 \text{ mV s}^{-1}$ .

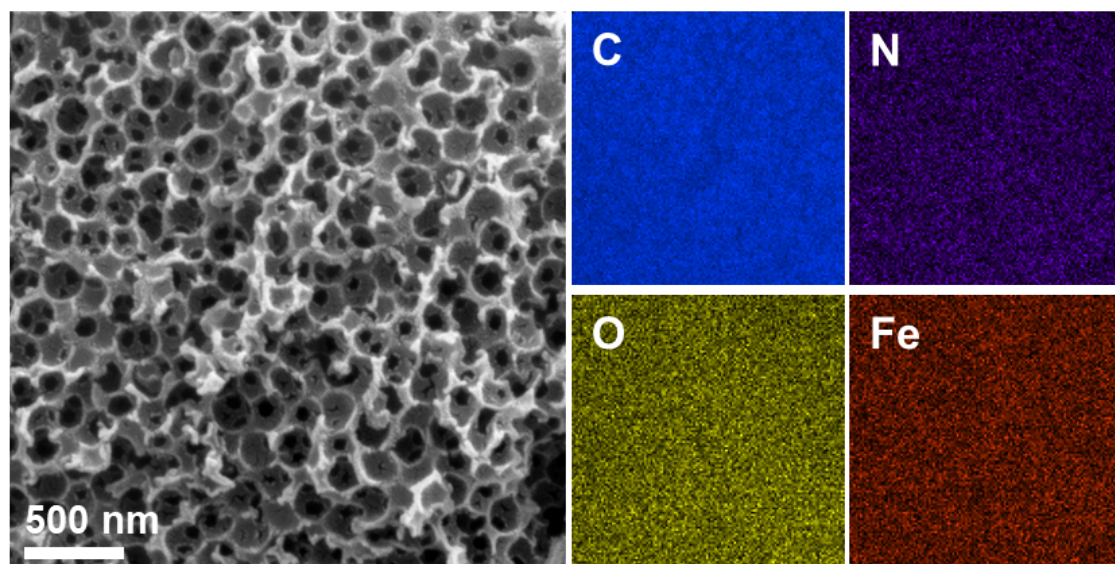

**Fig. S8** SEM image of SA-Fe-3DOMC after 10,000 potential cycles and corresponding elemental images.

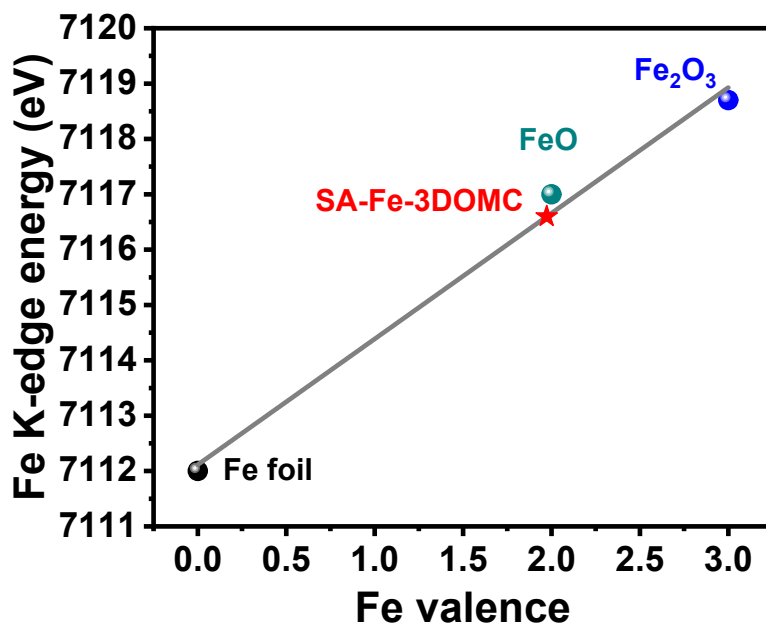

**Fig. S9** Linear fitting curve of SA-Fe-3DOMC and reference materials derived from corresponding Fe K-edge XANES spectra.

**Table S1.** Fe K-edge EXAFS fitting results.

| Sample      | Path | $N$   | $R(\text{\AA})$ | $\sigma^2(\times 10^{-3} \text{\AA}^2)$ | $\Delta E_0$ (eV) | R factor |
|-------------|------|-------|-----------------|-----------------------------------------|-------------------|----------|
| SA-Fe-3DOMC | Fe-N | 4.178 | 2.006           | 7.45                                    | -3.262            | 0.020    |

[a]:  $k$  range: 2-11.0 ( $\text{\AA}^{-1}$ );  $R$  range: 1-2  $\text{\AA}$ ;  $S_0^2 = 0.8335$  was determined from the Fe foil and used for Fe K-edge fitting.

## References

1. A. I. Douka, Y. Xu, H. Yang, S. Zaman, Y. Yan, H. Liu, M. A. Salam and B. Y. Xia, *Adv. Mater.*, 2020, **32**, 2002170.
2. I. S. Amiin, X. Liu, Z. Pu, W. Li, Q. Li, J. Zhang, H. Tang, H. Zhang and S. Mu, *Adv. Funct. Mater.*, 2018, **28**, 104670.
3. J. Zhang, Q. D. Li, I. S. Amiin, H. Wu, C. Y. Zhang, K. Cheng, H. Zhou and S. C. Mu, *Electrochim. Acta*, 2015, **177**, 73-78.
4. Y. Liang, Y. Li, H. Wang, J. Zhou, J. Wang, T. Regier and H. Dai, *Nat Mater*, 2011, **10**, 780-786.
5. J.-T. Ren, Y.-S. Wang, L. Chen, L.-J. Gao, W.-W. Tian and Z.-Y. Yuan, *Chem. Eng. J.*, 2020, **389**, 124408.
6. L. Yapeng, G. Jingyu, Z. Fu, Q. Qizhu, L. Yi and Z. Genqiang, *J. Mater. Chem. A*, 2018, **6**, 15523-15529.
7. N. Yanli, T. Xue, G. Shuaiqi and C. Zuofeng, *J. Mater. Chem. A*, 2020, **8**, 13725-13734.
